# Supplementary material for: The Appointment Scheduling Game
Source: Atypon-hosted journal article supplement (doi:10.1287/ited.2013.0119), 2014-01-01
Supplement: ited.2013.0119-sm [file ited.2013.0119-sm%2Fgame_description.doc]

**The Appointment Scheduling Game**

It is the end of the day on December 14th and requisitions for appointments that can be booked on December 15th or later are sitting in your inbox waiting to be assigned.  There are three urgency categories for appointments, each category with a different wait time target.  We will simulate the challenge facing the scheduling clerk.

Here is how.  Place the December-January calendar in front of you.  Roll the die and then reach into the sack and pick out as many chips as the number that appears on the die.  Each chip corresponds to the requisition of a patient waiting to be scheduled that has arrived today.  The different colors correspond to different urgency categories according to the table below.  Place the chips on the calendar, starting on December 15th, with at most three chips (the daily capacity) on each date.  Assume that appointments can be scheduled on any day including the weekend (and holidays) and that once an appointment day is set it cannot be changed.

Table: Urgency categories and wait time targets

| **Chip color** | **Urgency category** | **Wait time target[[1]](#footnote-2)** |
| --- | --- | --- |
| Red | 1 | 2 days |
| Blue | 2 | 4 days |
| White | 3 | 6 days |

Now it is the next day.  Do the same as above and repeat until you have assigned the patients whose requisitions arrive on December 23rd.  We will now break for discussion and come back to the game and play another ten days after sharing our experiences.

1. For a requisition sitting in your inbox on December 14th, a wait time target of 2 days means that the corresponding appointment should be booked either on December 15th or December 16th, if possible. [↑](#footnote-ref-2)
